# Supplementary material for: Prenatal parental tobacco smoking, gene specific DNA methylation, and newborns size: the Generation R study
Source: PubMed Central journal article supplement (PMC4531498; doi:10.1186/s13148-015-0115-z), 2015-08-11
Supplement: 13148_2015_115_MOESM3_ESM.pdf [file 13148_2015_115_MOESM3_ESM.pdf]

|                                                                                                                                                       | <i>IGF2DMR</i> methylation |                     |              | <i>H19</i> methylation |                     |              |
|-------------------------------------------------------------------------------------------------------------------------------------------------------|----------------------------|---------------------|--------------|------------------------|---------------------|--------------|
|                                                                                                                                                       | $\beta^1$                  | 95% CI              | P-value      | $\beta^1$              | 95% CI              | P-value      |
| <b>MODEL 1: adjusted for correlations between CpG sites, bisulphite batch, gestational age at birth</b>                                               |                            |                     |              |                        |                     |              |
| <i>Maternal tobacco smoking</i>                                                                                                                       |                            |                     |              |                        |                     |              |
| No (n=277)                                                                                                                                            |                            | reference           |              |                        | reference           |              |
| First trimester only (n=37)                                                                                                                           | -0.82                      | -1.94; 0.31         | 0.154        | 0.48                   | -0.37; 1.33         | 0.265        |
| Continued smoking, all (n=104)                                                                                                                        | <b>-1.13</b>               | <b>-1.87; -0.39</b> | <b>0.003</b> | -0.43                  | -0.99; 0.13         | 0.135        |
| <5 cigarettes per day (n=34)                                                                                                                          | <b>-1.25</b>               | <b>-2.43; -0.08</b> | <b>0.037</b> | <b>-0.92</b>           | <b>-1.80; -0.04</b> | <b>0.041</b> |
| $\geq 5$ cigarettes per day (n=51)                                                                                                                    | -0.93                      | -1.94; 0.07         | 0.068        | -0.18                  | -0.91; 0.56         | 0.637        |
| P for trend                                                                                                                                           |                            | <b>0.021</b>        |              |                        | 0.300               |              |
| <i>Paternal tobacco smoking</i>                                                                                                                       |                            |                     |              |                        |                     |              |
| No (n=176)                                                                                                                                            |                            | reference           |              |                        | reference           |              |
| Yes (n=100)                                                                                                                                           | -0.19                      | -0.98; 0.60         | 0.639        | 0.17                   | -0.39; 0.73         | 0.550        |
| <5 cigarettes per day (n=48)                                                                                                                          | -0.26                      | -1.30; 0.78         | 0.621        | 0.16                   | -0.58; 0.89         | 0.679        |
| $\geq 5$ cigarettes per day (n=51)                                                                                                                    | -0.05                      | -1.06; 0.96         | 0.922        | 0.16                   | -0.56; 0.89         | 0.658        |
| P for trend                                                                                                                                           |                            | 0.819               |              |                        | 0.603               |              |
| <b>MODEL 2: model 1 + maternal characteristics (age, educational level, parity, BMI, periconceptional folic acid supplement use) and fetal gender</b> |                            |                     |              |                        |                     |              |
| <i>Maternal tobacco smoking</i>                                                                                                                       |                            |                     |              |                        |                     |              |
| No (n=277)                                                                                                                                            |                            | reference           |              |                        | reference           |              |
| First trimester only (n=37)                                                                                                                           | -0.89                      | -2.04; 0.25         | 0.127        | 0.40                   | -0.46; 1.25         | 0.366        |
| Continued smoking, all (n=104)                                                                                                                        | <b>-1.18</b>               | <b>-1.98; -0.37</b> | <b>0.004</b> | <b>-0.62</b>           | <b>-1.24; -0.00</b> | <b>0.049</b> |
| <5 cigarettes per day (n=34)                                                                                                                          | <b>-1.30</b>               | <b>-2.50; -0.10</b> | <b>0.033</b> | <b>-0.93</b>           | <b>-1.82; -0.03</b> | <b>0.043</b> |
| $\geq 5$ cigarettes per day (n=51)                                                                                                                    | -0.81                      | -1.88; 0.26         | 0.136        | -0.32                  | -1.11; 0.46         | 0.420        |
| P for trend                                                                                                                                           |                            | <b>0.044</b>        |              |                        | 0.184               |              |
| <i>Paternal tobacco smoking</i>                                                                                                                       |                            |                     |              |                        |                     |              |
| No (n=176)                                                                                                                                            |                            | reference           |              |                        | reference           |              |
| Yes (n=100)                                                                                                                                           | -0.19                      | -1.01; 0.63         | 0.646        | 0.05                   | -0.51; 0.62         | 0.860        |
| <5 cigarettes per day (n=48)                                                                                                                          | -0.23                      | -1.29; 0.83         | 0.670        | 0.14                   | -0.59; 0.86         | 0.712        |
| $\geq 5$ cigarettes per day (n=51)                                                                                                                    | -0.07                      | -1.14; 1.00         | 0.895        | -0.07                  | -0.82; 0.67         | 0.849        |
| P for trend                                                                                                                                           |                            | 0.803               |              |                        | 0.958               |              |

**Table S3: Parental tobacco smoking habits and DNA methylation, with exclusion of ADHD cases**

Results from linear mixed model analyses with maternal or paternal tobacco smoking as independent variable and DNA methylation as dependent variable. <sup>1</sup>Analyses were performed with square-root transformed methylation data and values are presented as regression coefficients (95% confidence interval). Analyses on paternal smoking were restricted to non-smoking mothers.
