# Supplementary material for: Prenatal parental tobacco smoking, gene specific DNA methylation, and newborns size: the Generation R study
Source: PubMed Central journal article supplement (PMC4531498; doi:10.1186/s13148-015-0115-z), 2015-08-11
Supplement: 13148_2015_115_MOESM4_ESM.pdf [file 13148_2015_115_MOESM4_ESM.pdf]

| Gene                                | Genomic location <sup>1</sup> | Number of CpG units assessed | Primer sequence <sup>2</sup>                                | Source         |
|-------------------------------------|-------------------------------|------------------------------|-------------------------------------------------------------|----------------|
| Insulin-like growth factor 2 (IGF2) | Chr 11: 2169458-2169796       | 3 CpG units (4 CpG sites)    | F: TGGATAGGAGATTGAGGAGAAA<br>R: AAACCCCAACAAAAACCACT        | Heijmans, 2007 |
| H19                                 | Chr 11: 2019371-2019784       | 10 CpG units (13 CpG sites)  | F: GGGTTTGGGAGAGTTTGTGAGGT<br>R: ATACCTACTACTCCCTACCTACCAAC | Heijmans, 2007 |

**Table S4: Details of measured amplicons and PCR primers**

<sup>1</sup> Genome built: GRch 37.67

<sup>2</sup> Forward and reverse primer that will amplify the bisulphite converted genomic DNA. According to the MassARRAY EpiTYPER technology, tags were added to the 5' end of the primers. Forward primer: 10mer spacer tag is added at the 5' primer end with the following sequence: 5'-AGGAAGAGAG + primer. Reverse primer: T7 promoter is added to the 5' primer end with the following sequence: 5'-CAGTAATACGACTCACTATAGGGAGAAGGCT + primer
