# Supplementary material for: Prenatal parental tobacco smoking, gene specific DNA methylation, and newborns size: the Generation R study
Source: PubMed Central journal article supplement (PMC4531498; doi:10.1186/s13148-015-0115-z), 2015-08-11
Supplement: 13148_2015_115_MOESM5_ESM.pdf [file 13148_2015_115_MOESM5_ESM.pdf]

| Locus/unit | Reason for exclusion                                           | Success rate<br>(if included) |
|------------|----------------------------------------------------------------|-------------------------------|
| IGF2 DMR   |                                                                |                               |
| IGF2_01    | Excluded due to rs3741208                                      |                               |
| IGF2_02    | Excluded due to rs3741209                                      |                               |
| IGF2_03    |                                                                | 91.8%                         |
| IGF2_04    |                                                                | 94.1%                         |
| IGF2_05    | Excluded due to rs4930041                                      |                               |
| IGF2_06.07 |                                                                | 94.9%                         |
| IGF2_08    | Excluded due to silent signal                                  |                               |
| H19        |                                                                |                               |
| H19_01     | Excluded due to duplicate H19_16 and silent signals            |                               |
| H19_02     |                                                                | 95.6%                         |
| H19_03-05  | Excluded due to rs117916983, overlap H19_11 and silent signals |                               |
| H19_06     | Excluded due to silent signals                                 |                               |
| H19_07     | Excluded due to silent signal                                  |                               |
| H19_08     | Excluded due to silent signal                                  |                               |
| H19_09.10  |                                                                | 95.0%                         |
| H19_11     | Excluded due to overlap H19_03-05 and silent signals           |                               |
| H19_12     |                                                                | 95.4%                         |
| H19_13     |                                                                | 95.1%                         |
| H19_14.15  |                                                                | 96.7%                         |
| H19_16     | Excluded due to duplicate H19_1 and silent signals             |                               |
| H19_17     |                                                                | 95.3%                         |
| H19_18.19  |                                                                | 95.6%                         |
| H19_20     |                                                                | 95.6%                         |
| H19_21     | Excluded due to low mass and silent signal                     |                               |
| H19_22     | Excluded due to silent signal                                  |                               |
| H19_23     | Excluded due to low mass                                       |                               |
| H19_24     | Excluded due to >25% missing                                   |                               |
| H19_25     |                                                                | 94.7%                         |

**Table S5: details quality control**
